# Supplementary material for: Optimization of Biomass Accumulation and Production of Phenolic Compounds in Callus Cultures of Rhodiola rosea L. Using Design of Experiments
Source: MDPI journal article supplement (doi:10.3390/plants11010124), 2022-01-02
Supplement: s1 [file s1]

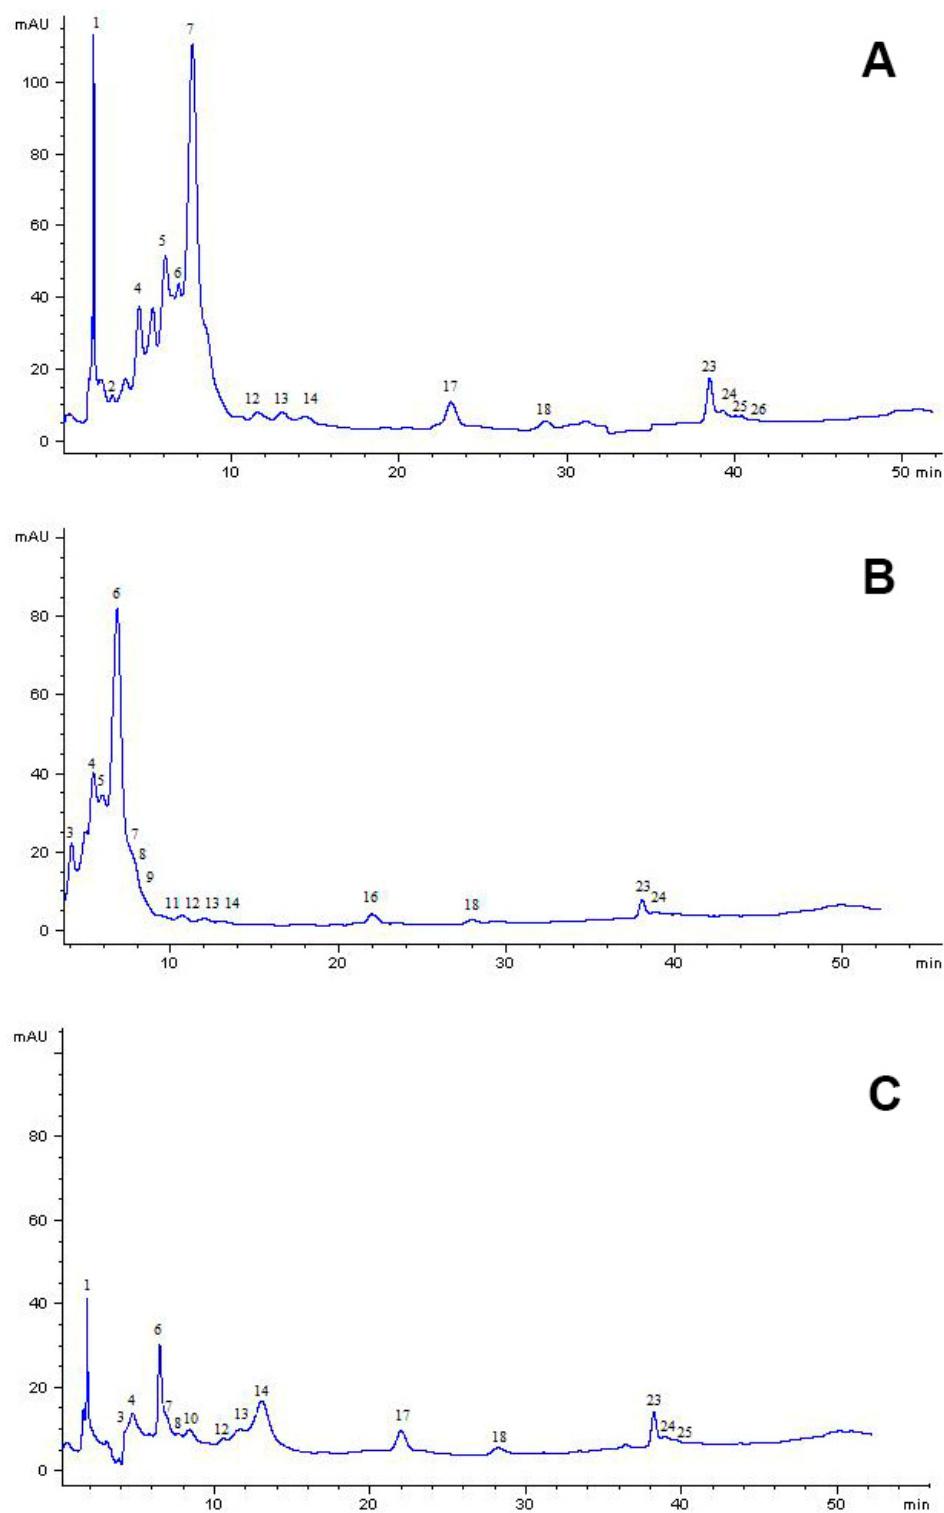

**Figure S1.** A chromatogram of a water-ethanol extract of the *R. rosea* callus culture that featured the highest TPC concentration. **(A)**  $\text{NH}_4^+/\text{K}^+$  0.33,  $\text{NO}_3^-$  20 mM, BAP/NAA 0.33, BAP+NAA 30  $\mu\text{M}$ . **(B)**  $\text{NH}_4^+/\text{K}^+$  0.33,  $\text{NO}_3^-$  60 mM, BAP/NAA 0.33, BAP+NAA 30  $\mu\text{M}$ . **(C)**  $\text{NH}_4^+/\text{K}^+$  0.33,  $\text{NO}_3^-$  40 mM, BAP/NAA 0.33, BAP+NAA 30  $\mu\text{M}$ . Note: The X-axis is retention time (t), min; Y-axis: optical density, arbitrary units (mAU). The numbers in the chromatogram indicate ID numbers of phenolic compounds (see Table S1).

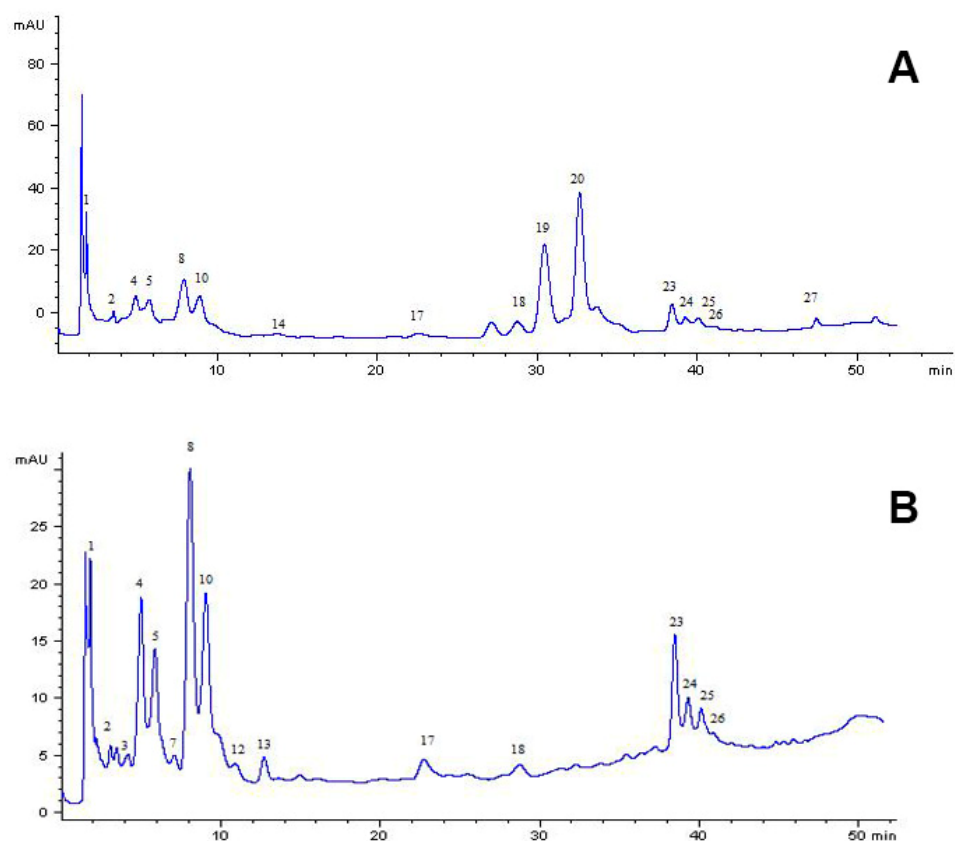

**Figure S2.** A chromatogram of a water-ethanol extract of the *R. rosea* callus culture cultivated under optimal nutrient conditions **(A)** with MJ 100  $\mu$ M and **(B)** without MJ. Note: The X-axis is retention time (t), min; Y-axis: optical density, arbitrary units (mAU). The numbers in the chromatogram indicate ID numbers of phenolic compounds (see Table S1).

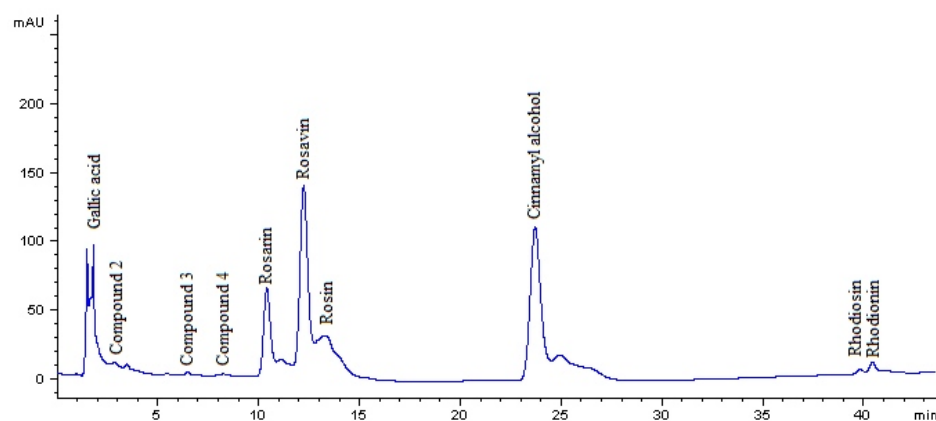

**Figure S3.** A chromatogram of a water-ethanol extract of *R. rosea* rhizomes. The X-axis is retention time (t), min; the Y-axis is optical density, arbitrary units (mAU).

**Table S1.** Characteristics and levels of the phenolic compounds detected by HPLC in the extracts from callus cultures and above-ground parts (herb) of *R. rosea* (mg/g)

| Compound ID | Spectral characteristics:<br>$\lambda_{\text{max}}$ , nm | Retention time (tr), min | Treatment group ID (boldfaced header), showing concentrations below, mg/g of air-dried material |       |       |       |       |       |       |       |       |       |       |       |       |       |       |      |       |
|-------------|----------------------------------------------------------|--------------------------|-------------------------------------------------------------------------------------------------|-------|-------|-------|-------|-------|-------|-------|-------|-------|-------|-------|-------|-------|-------|------|-------|
|             |                                                          |                          | 1                                                                                               | 2     | 3     | 4     | 5     | 6     | 7     | 8     | 9     | 10    | 11    | 12    | 13    | 14    | 15    | 16   | Herb  |
| 1           | 272                                                      | 1.8                      | 1.39                                                                                            | 5.21  | 3.53  | 3.45  | 6.35  | 3.07  | 4.52  | 2.09  | 3.17  | 3.20  | 2.25  | 3.48  | 3.37  | 3.11  | 4.24  | –    | 2.53  |
| 2           | 216, 280                                                 | 2.9                      | 0.51                                                                                            | 2.13  | 0.61  | 0.70  | –     | 1.14  | 3.58  | 1.08  | –     | 2.28  | 0.84  | 2.27  | 2.15  | 1.19  | 1.15  | –    | 0.94  |
| 3           | 242, 340                                                 | 4.1                      | 0.52                                                                                            | –     | 5.14  | 0.84  | 0.52  | 1.43  | 5.03  | 0.71  | –     | 6.50  | 0.60  | 1.34  | 2.15  | –     | –     | –    | 0.91  |
| 4           | 242, 340                                                 | 4.6                      | 1.51                                                                                            | 8.41  | 7.28  | 7.13  | 4.02  | 5.01  | 6.17  | 3.44  | 5.27  | 4.17  | 1.48  | 1.45  | 3.35  | 4.23  | 2.10  | 0.32 | 1.30  |
| 5           | 242, 332                                                 | 6.0                      | 1.05                                                                                            | 18.10 | –     | 3.12  | –     | 5.23  | 7.13  | 3.07  | 1.28  | –     | –     | 3.02  | 2.17  | 3.01  | 2.43  | –    | 0.41  |
| 6           | 228, 296                                                 | 6.5                      | 0.15                                                                                            | 7.15  | 23.02 | –     | 8.38  | –     | 28.11 | 0.62  | 1.09  | 14.07 | 0.92  | 4.29  | 5.23  | –     | –     | –    | 5.92  |
| 7           | 244, 340                                                 | 7.1                      | 0.23                                                                                            | 18.23 | 4.16  | –     | 2.25  | 1.02  | 5.07  | –     | –     | –     | 0.81  | 2.44  | 4.16  | –     | –     | 0.31 | 5.01  |
| 8           | 242, 350                                                 | 7.8                      | 1.08                                                                                            | –     | –     | –     | 0.63  | 9.28  | 2.35  | 4.03  | 4.11  | –     | –     | 3.22  | –     | 5.31  | 5.22  | 0.20 | 2.06  |
| 9           | 270, 352                                                 | 8.3                      | –                                                                                               | –     | –     | –     | –     | –     | 4.20  | –     | –     | –     | –     | –     | –     | –     | –     | –    | –     |
| 10          | 218, 274                                                 | 8.5                      | 1.64                                                                                            | –     | –     | –     | 2.59  | 6.47  | –     | 3.32  | 6.27  | –     | 1.53  | 3.47  | 6.21  | 4.17  | 3.01  | 0.31 | 10.53 |
| 11          | 270                                                      | 9.2                      | –                                                                                               | –     | –     | –     | –     | –     | 2.10  | –     | –     | –     | –     | –     | –     | –     | –     | –    | –     |
| 12          | 216, 280                                                 | 10.8                     | 0.40                                                                                            | 2.14  | 0.40  | –     | 1.07  | 0.82  | 0.41  | –     | 2.51  | 0.10  | 1.42  | 1.63  | 1.27  | –     | –     | –    | 1.04  |
| 13          | 216, 280                                                 | 12.0                     | 0.41                                                                                            | 2.33  | 0.41  | –     | 3.17  | 0.65  | 0.32  | –     | 3.20  | 0.11  | 2.09  | 5.39  | 3.41  | –     | –     | –    | 9.50  |
| 14          | 216, 280                                                 | 13.6                     | 0.20                                                                                            | 1.28  | 0.31  | –     | 13.08 | –     | 0.20  | 0.50  | 16.09 | 0.10  | 2.15  | 8.57  | 10.24 | 0.31  | –     | –    | 23.01 |
| 15          | 220, 288                                                 | 20.0                     | 0.22                                                                                            | –     | –     | –     | –     | –     | –     | –     | –     | –     | 1.43  | 0.42  | 1.45  | –     | –     | –    | 0.72  |
| 16          | 220, 288                                                 | 31.3                     | –                                                                                               | –     | –     | –     | –     | –     | 1.21  | –     | –     | –     | –     | 1.18  | 0.52  | –     | –     | –    | 0.70  |
| 17          | 256, 376                                                 | 22.2                     | 1.09                                                                                            | 3.53  | 1.46  | 1.03  | 4.35  | 0.83  | –     | 0.51  | 2.01  | 0.31  | 5.22  | –     | 0.51  | 0.44  | –     | –    | 1.32  |
| 18          | 255                                                      | 28.2                     | 2.59                                                                                            | 1.10  | 0.77  | 0.72  | 2.17  | 0.61  | 0.41  | 0.50  | 1.02  | 0.41  | 0.63  | 0.40  | 0.65  | 2.27  | 0.71  | –    | 1.30  |
| 19          | 254                                                      | 30.0                     | –                                                                                               | –     | –     | –     | –     | –     | –     | –     | –     | –     | –     | –     | –     | 8.41  | 5.27  | –    | –     |
| 20          | 252                                                      | 33.3                     | –                                                                                               | –     | –     | –     | –     | –     | –     | –     | –     | –     | –     | –     | 0.32  | 12.10 | 6.00  | –    | 0.42  |
| 21          | 270, 325                                                 | 35.4                     | –                                                                                               | –     | –     | –     | –     | –     | –     | –     | –     | –     | –     | –     | –     | –     | –     | 1.38 | –     |
| 22          | 216, 276                                                 | 36.3                     | –                                                                                               | –     | –     | –     | –     | –     | –     | –     | 1.07  | –     | 0.20  | –     | –     | –     | –     | –    | 0.33  |
| 23          | 256, 379                                                 | 38.1                     | 2.14                                                                                            | 3.40  | 1.03  | 3.23  | 4.53  | 3.51  | 0.91  | 2.50  | 2.44  | 0.31  | 5.07  | 0.44  | 0.81  | 2.45  | 1.37  | 2.07 | 2.64  |
| 24          | 256, 379                                                 | 38.9                     | 2.21                                                                                            | 1.53  | 0.43  | 1.26  | 1.68  | 2.04  | 0.55  | 0.86  | –     | –     | 2.47  | 2.16  | 0.80  | 1.17  | 1.09  | 0.42 | 1.61  |
| 25          | 256, 379                                                 | 39.7                     | 0.43                                                                                            | 0.33  | 0.40  | 0.91  | 1.22  | 1.22  | –     | 0.50  | 0.52  | –     | 0.74  | 1.15  | 0.54  | 1.09  | 1.13  | 1.32 | 1.0   |
| 26          | 220, 360                                                 | 40.4                     | –                                                                                               | 0.30  | –     | –     | –     | 0.52  | –     | –     | 0.50  | –     | –     | 0.41  | 0.42  | 0.51  | –     | –    | –     |
| 27          | 255, 270                                                 | 46.0                     | –                                                                                               | –     | –     | –     | –     | –     | –     | –     | –     | –     | –     | –     | –     | 0.72  | 0.51  | 1.17 | –     |
| TPC         |                                                          |                          | 17.77                                                                                           | 75.17 | 48.95 | 22.39 | 56.01 | 42.85 | 72.27 | 23.73 | 50.55 | 31.56 | 29.85 | 46.73 | 49.73 | 50.49 | 34.23 | 7.50 | 73.20 |

1: Gallic acid, "–": not detected. *Legend* (see Figure 3).
